# Supplementary material for: Designing of inhibitors against drug tolerant Mycobacterium tuberculosis (H37Rv)
Source: PubMed Central journal article supplement (PMC3639817; doi:10.1186/1752-153x-7-49), 2013-03-08
Supplement: 1752-153X-7-49-S1.pdf [file 1752-153X-7-49-S1.pdf]

# Histogram of Rep\_dataset

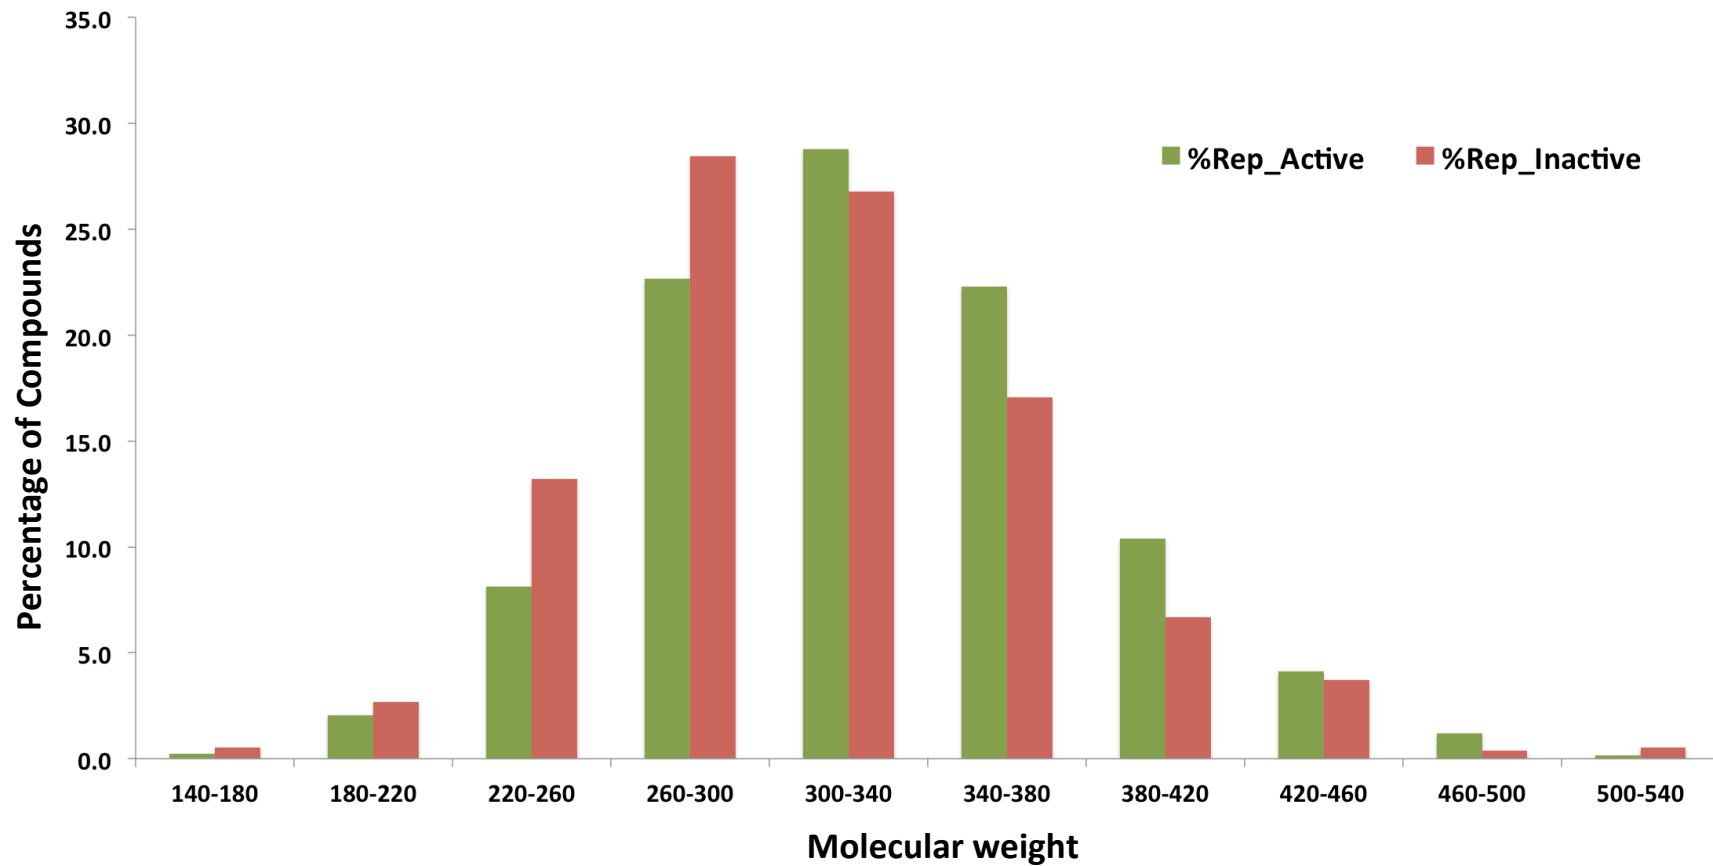

Figure-S1

# Histogram of Rep\_dataset

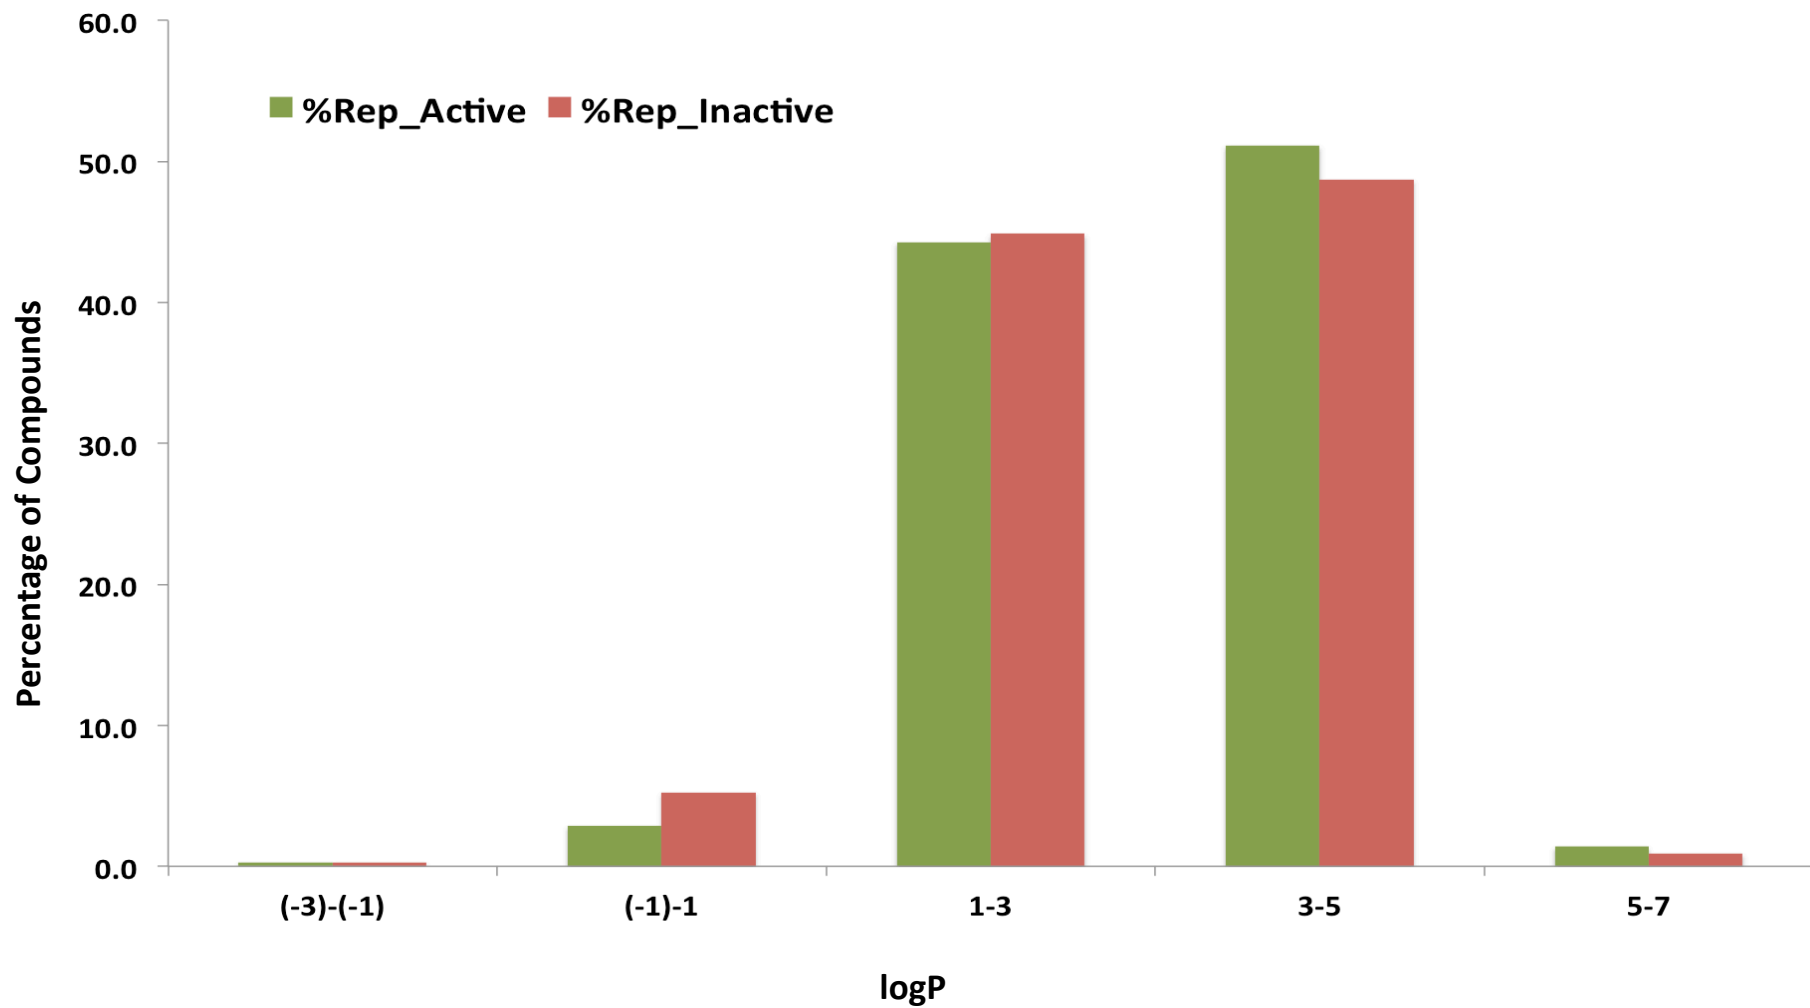

Figure-S2

# Histogram of Rep\_dataset

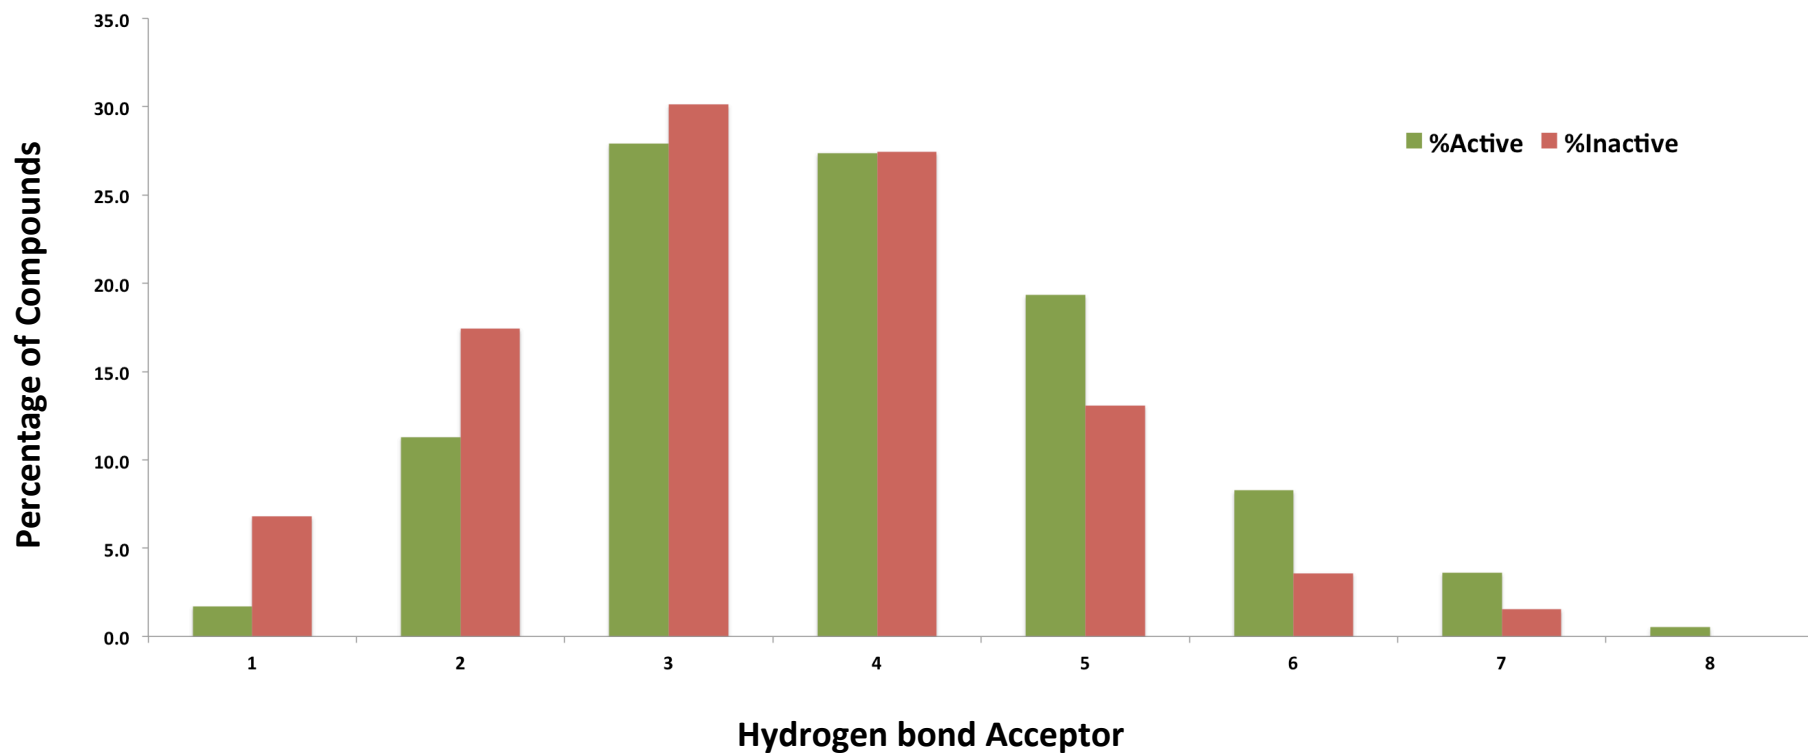

Figure-S3

# Histogram of Rep\_dataset

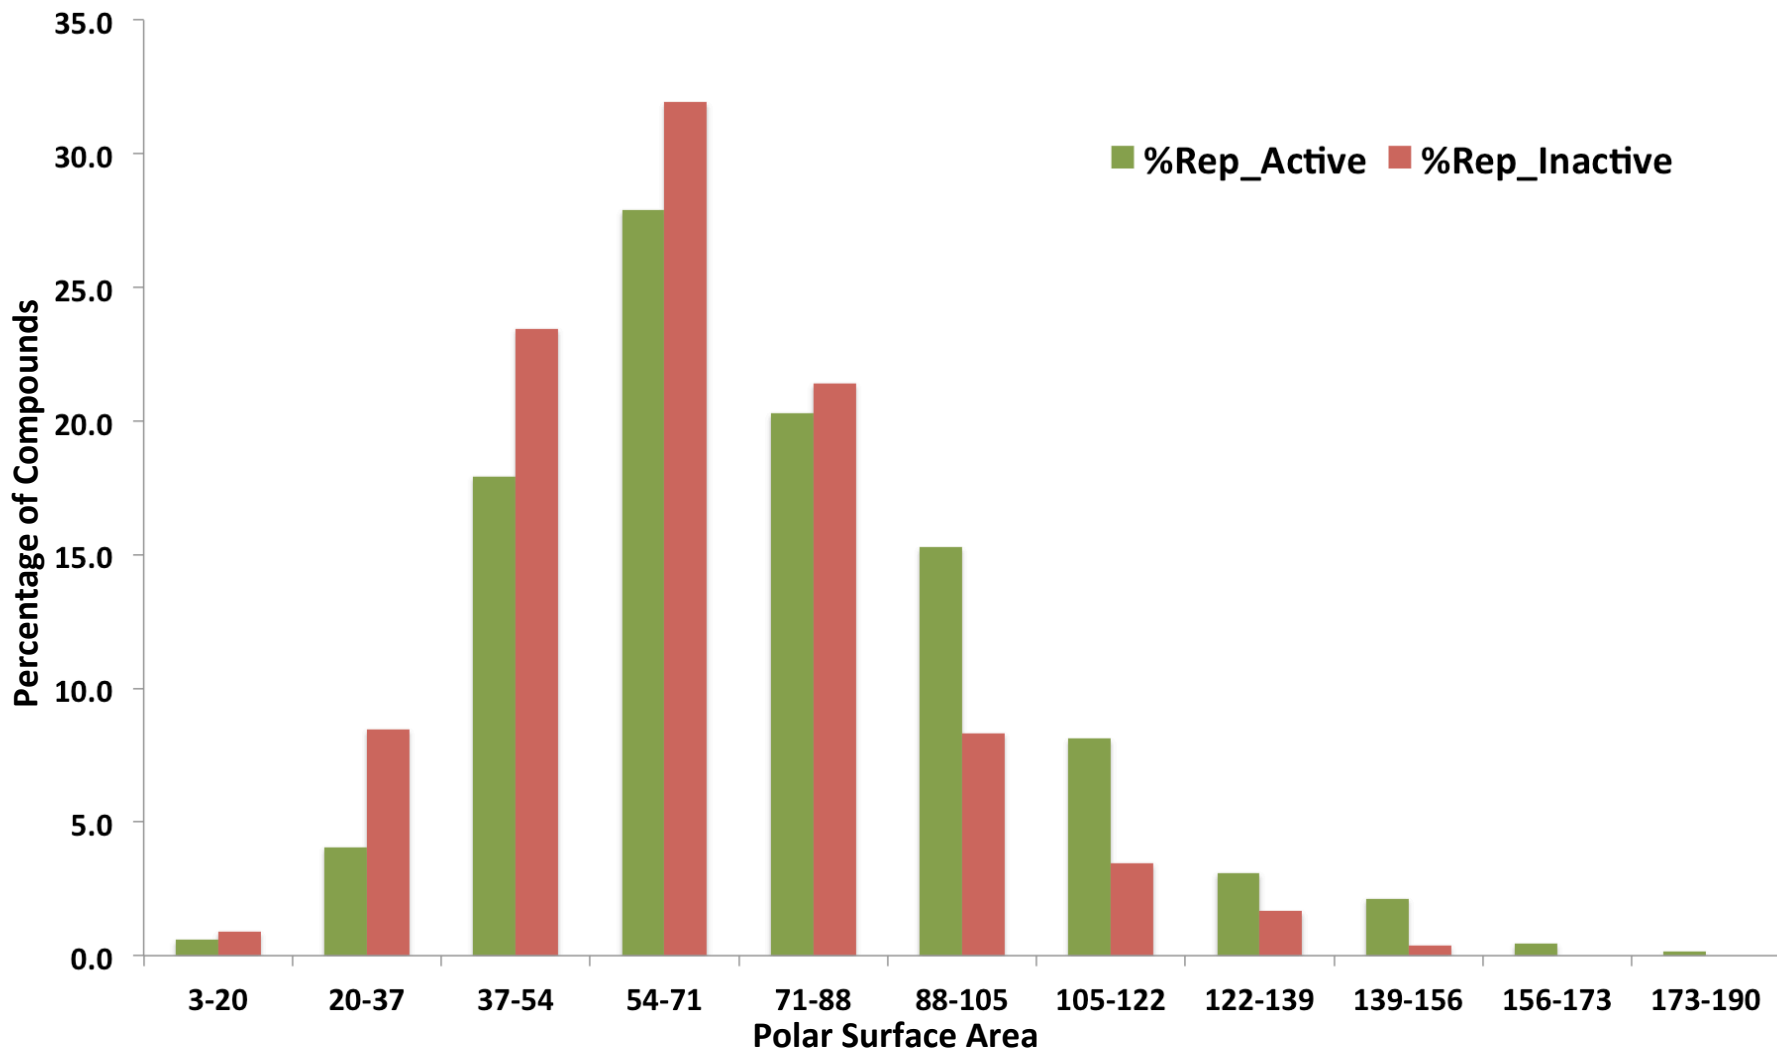

Figure-S4

# Histogram of Rep\_dataset

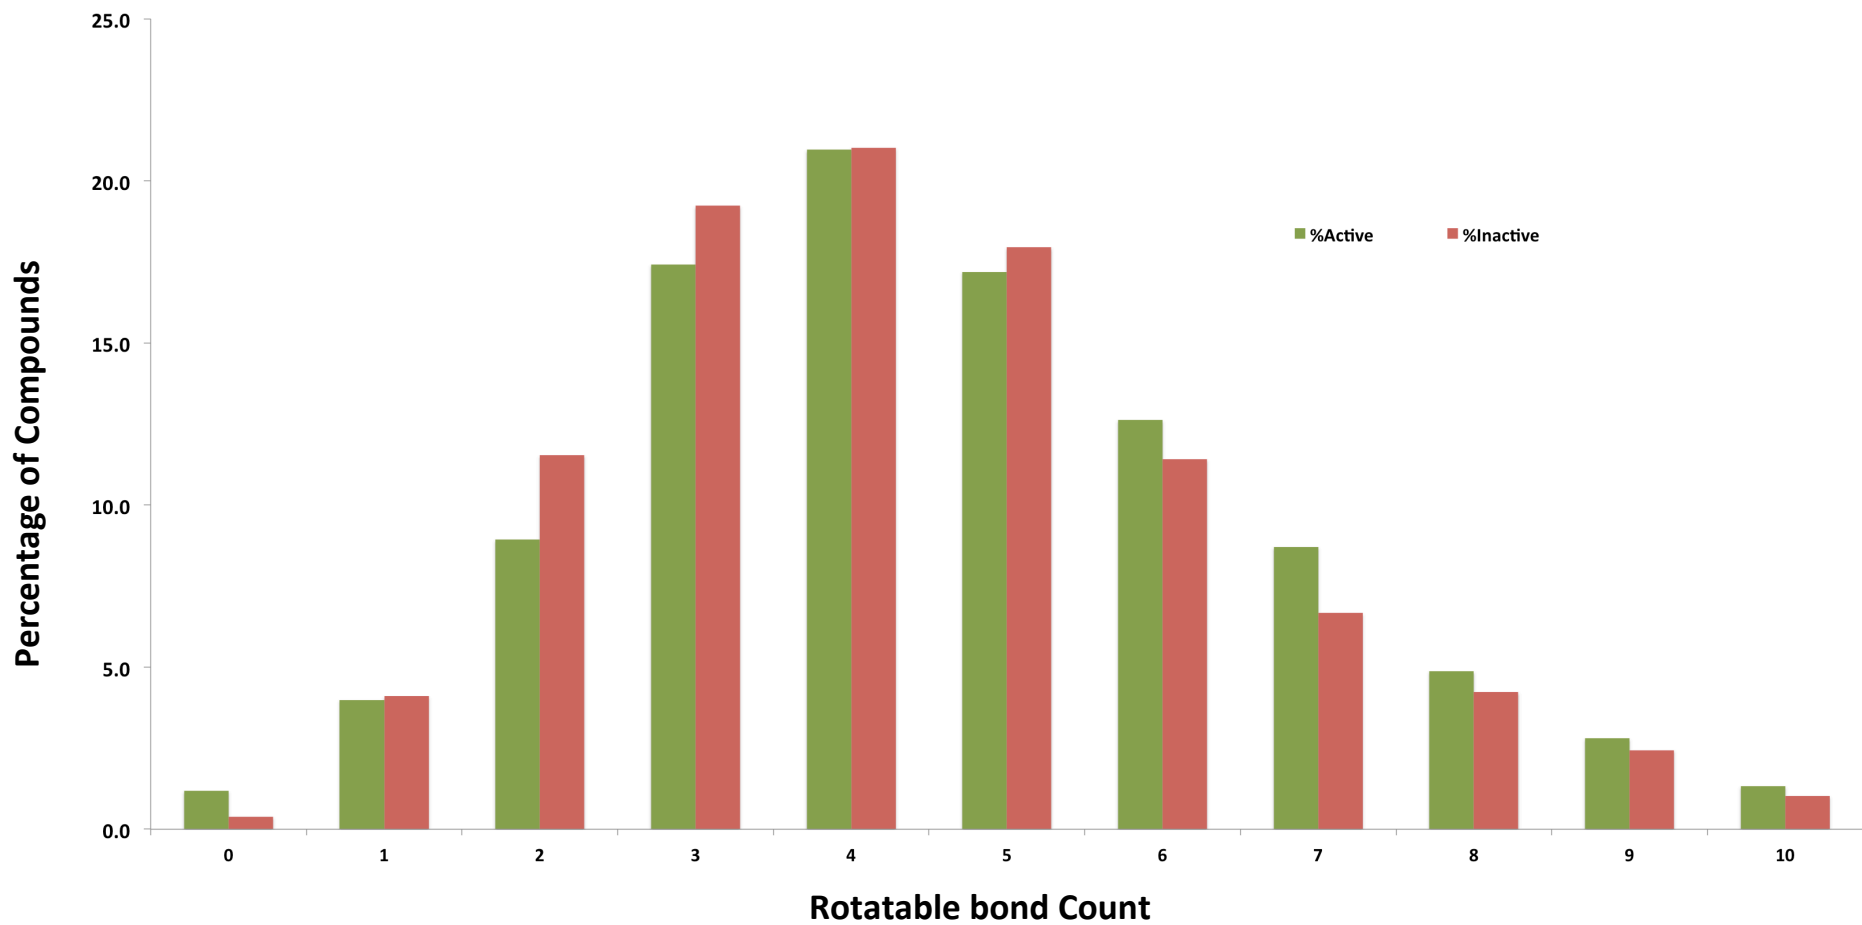

Figure-S5

# Histogram of Nrep\_dataset

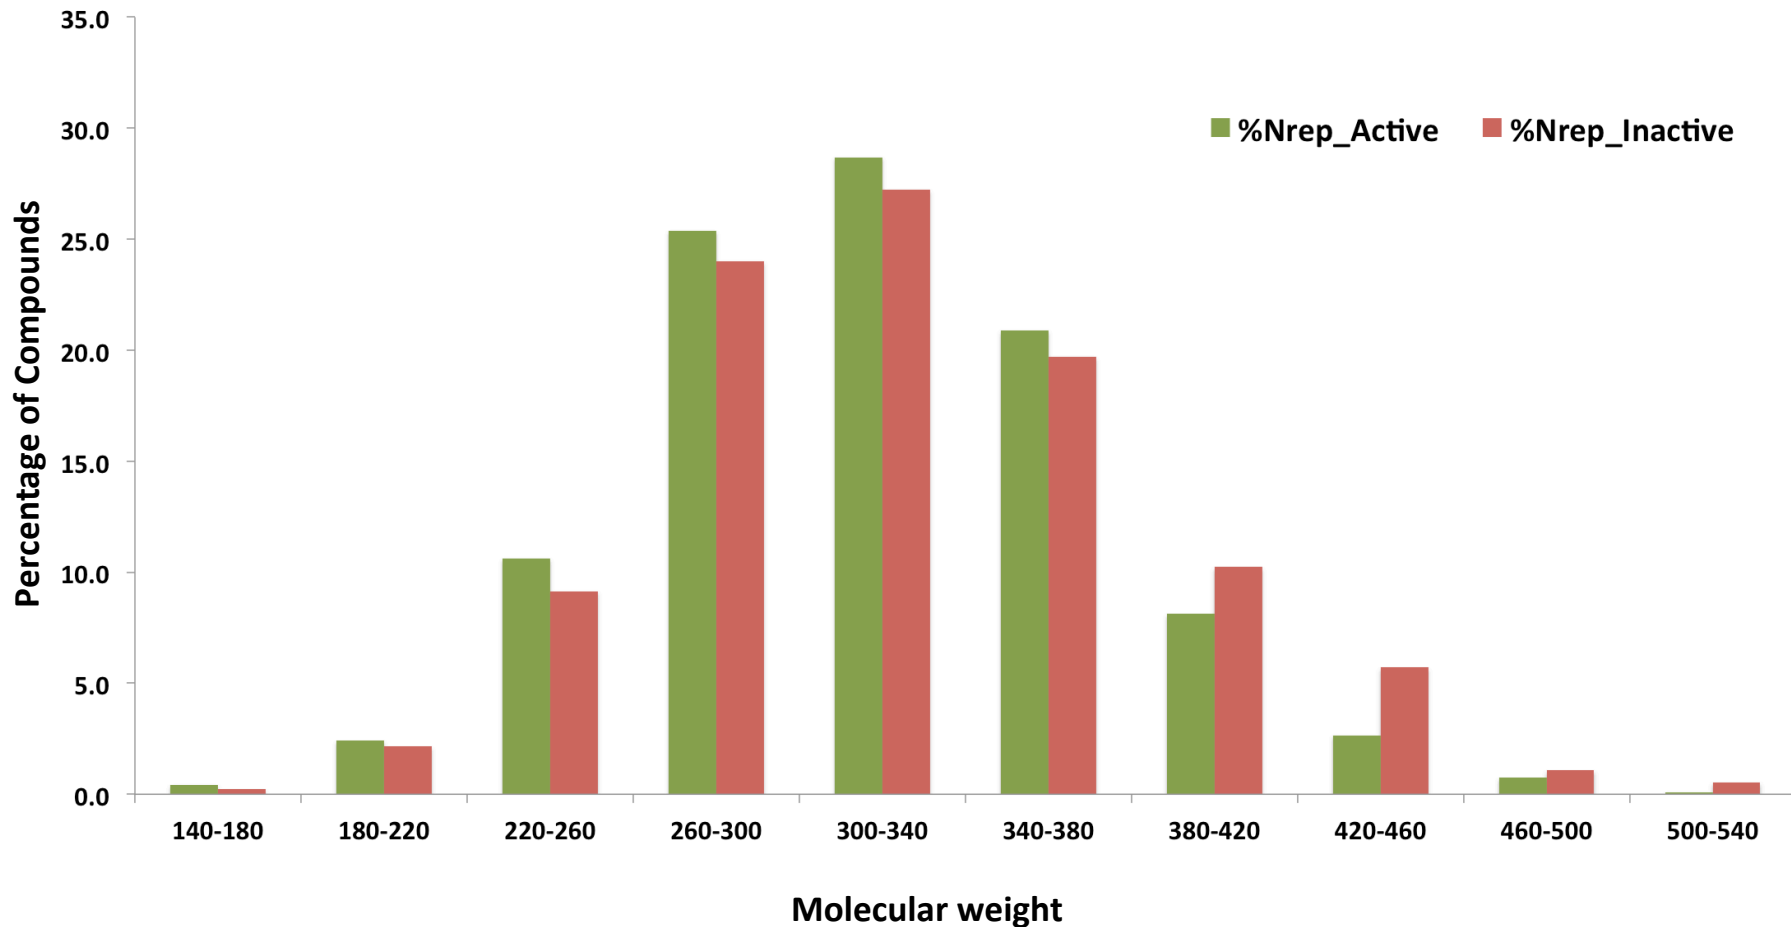

Figure-S6

# Histogram of Nrep\_dataset

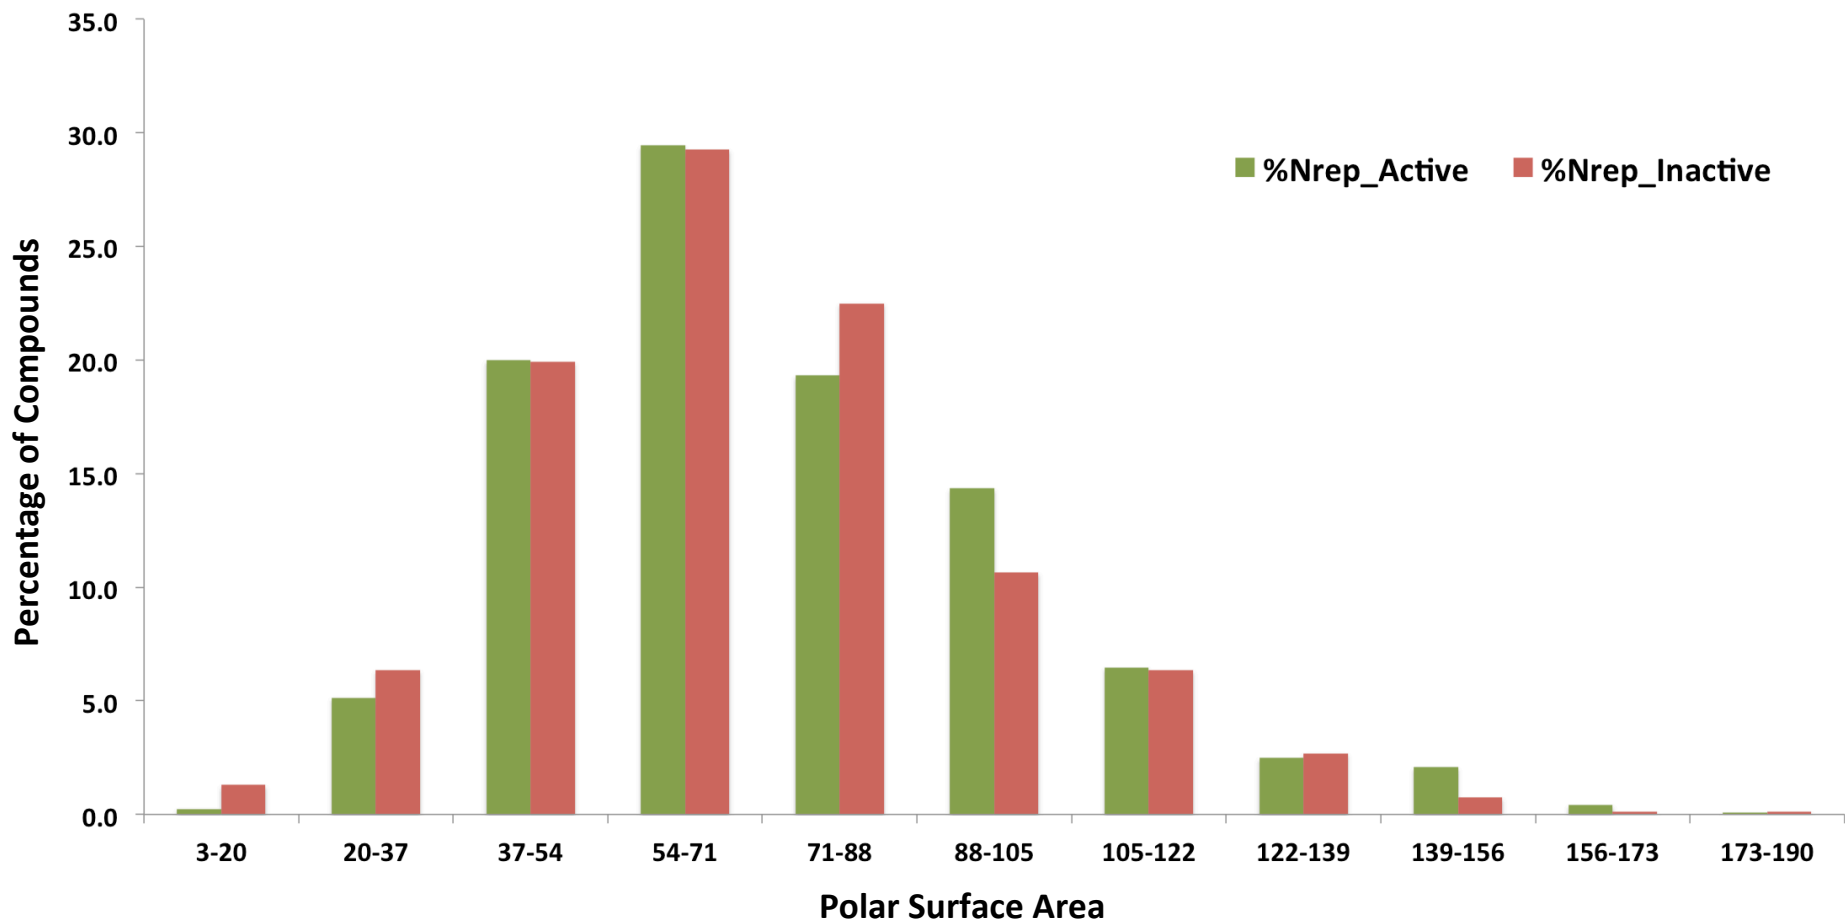

Figure-S7

# Histogram of Nrep\_dataset

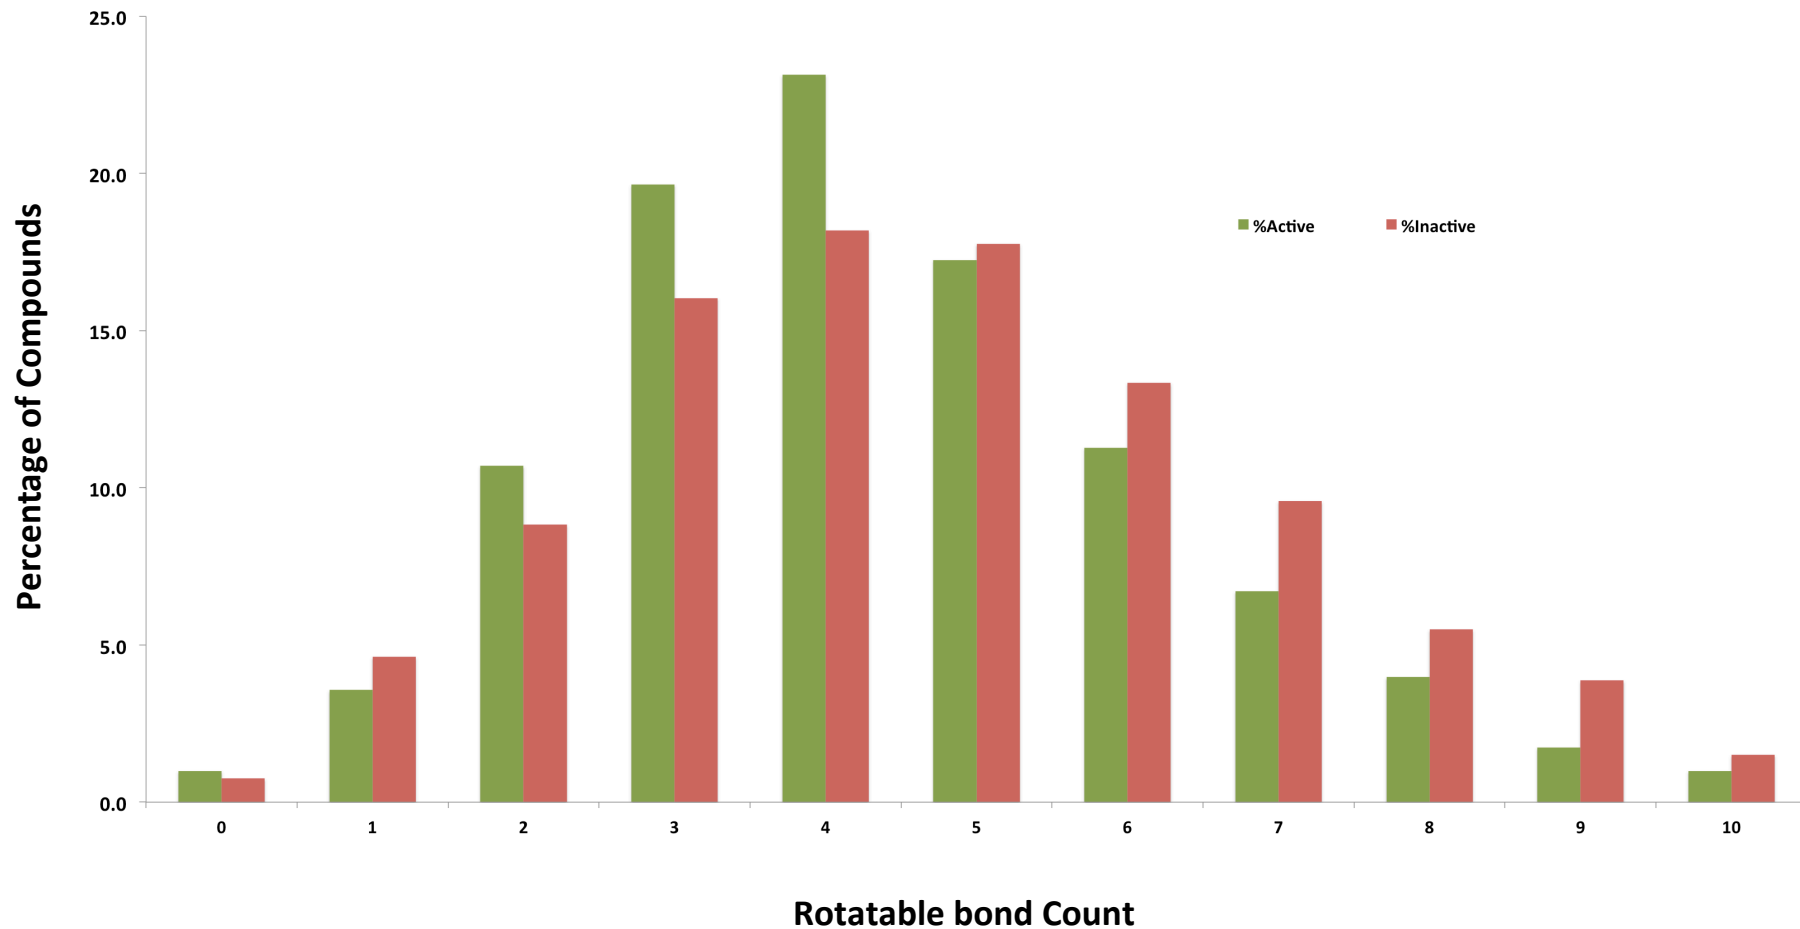

Figure-S8
